# Supplementary material for: Early-Life Risk Factors for Carotid Intima-Media Thickness and Carotid Stiffness in Adolescence
Source: PubMed Central journal article supplement (PMC11415786; doi:10.1001/jamanetworkopen.2024.34699), 2024-09-20
Supplement: jamanetwopen-e2434699-s001.pdf [file jamanetwopen-e2434699-s001.pdf]

## Supplemental Online Content

van der Linden IA, Roodenburg R, Nijhof SL, et al. Early-life risk factors for carotid intima-media thickness and carotid stiffness in adolescence. *JAMA Netw. Open.* 2024;7(9):e2434699. doi:10.1001/jamanetworkopen.2024.34699

**eTable 1.** Comparison of Participant Characteristics Between Participants Who Attended This Adolescent Follow-Up and Who Did Not Attend This Follow-Up

**eFigure 1.** Missing Data

**eTable 2.** Participant Characteristics Stratified by Sex

**eFigure 2.** Early-Life Risk Factors for Carotid Intima-Media Thickness and Carotid Distensibility in Adolescence

This supplemental material has been provided by the authors to give readers additional information about their work.

**eTable 1. Comparison of participant characteristics between participants who attended this adolescent follow-up and who did not attend this follow-up**

| Characteristic<br>No. (%) or mean (SD) | No                                  |                | Adolescent           |                |       |                |
|----------------------------------------|-------------------------------------|----------------|----------------------|----------------|-------|----------------|
|                                        | adolescent<br>follow-up<br>(N=2773) | N <sup>a</sup> | follow-up<br>(N=232) | N <sup>b</sup> | P     | 95% CI         |
| <i>Sex, female</i>                     | 1284 (50%)                          | 2556           | 122 (54%)            | 228            | 0.34  | -0.10 – 0.04   |
| <i>Birth weight, g</i>                 | 3542 (503)                          | 2488           | 3530 (506)           | 225            | 0.74  | -56.86 – 80.41 |
| <i>GA, wks</i>                         | 39.4 (1.4)                          | 2491           | 39.6 (1.4)           | 225            | 0.20  | -0.30 – 0.06   |
| <i>Maternal BMI</i>                    | 24.7 (4.0)                          | 2109           | 24.7 (4.0)           | 205            | 0.99  | -0.57 – 0.58   |
| <i>Paternal BMI</i>                    | 25.1 (3.2)                          | 2002           | 24.9 (3.1)           | 194            | 0.24  | -0.19 – 0.74   |
| <i>Maternal smoking in pregnancy</i>   | 157 (6.3%)                          | 2482           | 15 (6.7%)            | 225            | 0.84  | -0.04 – 0.03   |
| <i>Maternal ever smoked</i>            | 712 (34.5%)                         | 2064           | 72 (35.6%)           | 202            | 0.74  | -0.06 – 0.08   |
| <i>Paternal ever smoked</i>            | 758 (40.5%)                         | 1870           | 85 (45.7%)           | 186            | 0.17  | -0.02 – 0.13   |
| <i>Maternal SES, high educated</i>     | 1438 (69.7%)                        | 2063           | 134 (65.7%)          | 204            | 0.24  | -0.03 – 0.11   |
| <i>Paternal SES, high educated</i>     | 1253 (64.0%)                        | 1957           | 113 (59.8%)          | 189            | 0.25  | -0.03 – 0.11   |
| <i>Maternal ethnicity, Caucasian</i>   | 1695 (81.6%)                        | 2077           | 177 (87.6%)          | 202            | 0.03* | -0.12 - -0.01  |

GA: Gestational age, BMI: Body Mass Index in kg/m<sup>2</sup>, SES: Socioeconomic status. <sup>a</sup>Denominator of WHISTLER participants who did not attend adolescent follow-up. <sup>b</sup>Denominator of WHISTLER participants who did attend adolescent follow-up.

**eFigure 1. Missing Data**

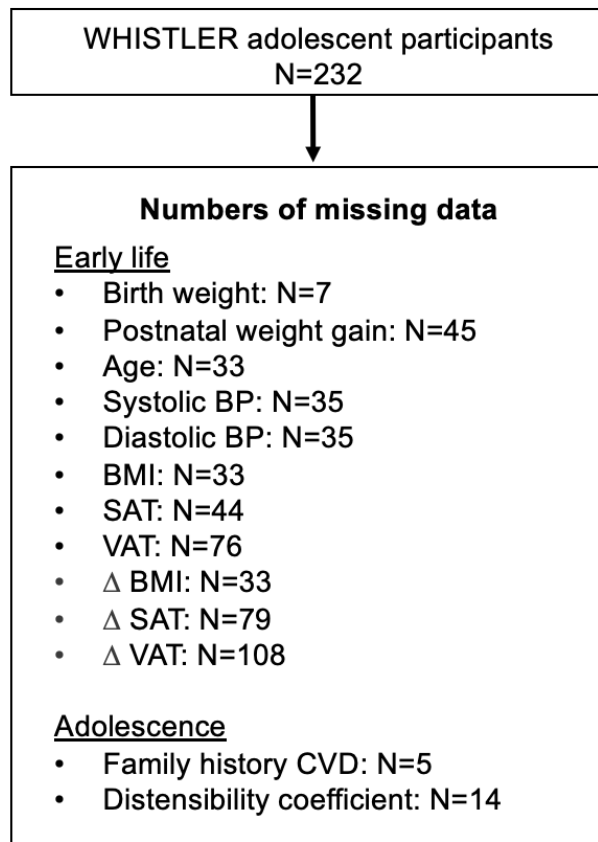

Postnatal weight gain: measured as the difference in weight Z-score from birth (corrected for sex and gestational age) to 6 months of age (corrected for age and sex). cIMT: carotid intima-media thickness, BMI: Body Mass Index, BP: blood pressure, SAT: abdominal subcutaneous adipose tissue depth, VAT: abdominal visceral adipose tissue depth, CVD: cardiovascular disease. “Δ” is the difference between adolescence (12-16 years) and early life (5 years) value.

**eTable 2. Participant characteristics stratified by sex (part 1)**

| Characteristic                                         | Birth<br>(0-6 months) |                |                  |                | N <sup>a</sup> |
|--------------------------------------------------------|-----------------------|----------------|------------------|----------------|----------------|
|                                                        | Male                  | N <sup>a</sup> | Female           | N <sup>a</sup> |                |
| <i>Gestational age, wks</i>                            | 39.0 (39.0–40.8)      | 104            | 40.0 (39.0–41.0) | 121            | 225            |
| <i>Birth weight, g</i>                                 | 3570 (530)            | 104            | 3495 (484)       | 121            | 225            |
| <i>Postnatal weight gain, Z-score<sup>d</sup></i>      | 0.2 (1.1)             | 82             | 0.0 (0.9)        | 105            | 187            |
| <i>Age, y</i>                                          |                       |                | NA               |                |                |
| <i>BMI, kg/m<sup>2</sup></i>                           |                       |                | NA               |                |                |
| <i>BMI, Z-score</i>                                    |                       |                | NA               |                |                |
| <i>Smoking, No. (%)</i>                                |                       |                | NA               |                |                |
| <i>Family history of CVD, No. (%)</i>                  |                       |                | NA               |                |                |
| <i>Systolic BP, mmHg</i>                               |                       |                | NA               |                |                |
| <i>Percentile<sup>e</sup></i>                          |                       |                | NA               |                |                |
| <i>Diastolic BP, mmHg</i>                              |                       |                | NA               |                |                |
| <i>Percentile<sup>e</sup></i>                          |                       |                | NA               |                |                |
| <i>SAT, mm</i>                                         |                       |                | NA               |                |                |
| <i>ΔSAT, mm</i>                                        |                       |                | NA               |                |                |
| <i>VAT, mm</i>                                         |                       |                | NA               |                |                |
| <i>ΔVAT, mm</i>                                        |                       |                | NA               |                |                |
| <i>cIMT, μm</i>                                        |                       |                | NA               |                |                |
| <i>Distensibility coefficient, 10<sup>-3</sup>/kPa</i> |                       |                | NA               |                |                |

This is original non-imputed data. Shown are number (N) (%), mean (SD) for variables with normal distributions or median (interquartile range) for variables with skewed distributions. BP: blood pressure, BMI: Body Mass Index, SAT: abdominal subcutaneous adipose tissue depth, VAT: abdominal visceral adipose tissue depth, CVD: cardiovascular disease, cIMT: carotid intima-media thickness, “Δ” is the difference between adolescence (12-16 years) and early life (5 years) value. <sup>a</sup>Denominator of birth characteristics. <sup>b</sup>Denominator of early life characteristics. <sup>c</sup>Denominator of adolescent characteristics. <sup>d</sup>Postnatal weight gain measured as the difference in weight Z-score from birth (corrected for sex and gestational age) to 6 months of age (corrected for sex and age). <sup>e</sup>BP percentiles were calculated based on sex, height, and age.

**eTable 2. Participant characteristics stratified by sex (continued - part 2)**

| Characteristic                                    | Early life<br>(5 years) |                |               |                | N <sup>b</sup> |
|---------------------------------------------------|-------------------------|----------------|---------------|----------------|----------------|
|                                                   | Male                    | N <sup>b</sup> | Female        | N <sup>b</sup> | Total          |
| Gestational age, wks                              | NA                      |                |               |                |                |
| Birth weight, g                                   | NA                      |                |               |                |                |
| Postnatal weight gain, Z-score <sup>d</sup>       | NA                      |                |               |                |                |
| Age, y                                            | 5.3 (5.2–5.5)           | 91             | 5.3 (5.2–5.5) | 108            | 199            |
| BMI, kg/m <sup>2</sup>                            | 15.2 (1.2)              | 91             | 15.0 (1.2)    | 108            | 199            |
| BMI, Z-score                                      | -0.2 (1.1)              | 91             | -0.2 (1.0)    | 108            | 199            |
| Smoking, No. (%)                                  | NA                      |                |               |                |                |
| Family history of CVD, No. (%)                    | NA                      |                |               |                |                |
| Systolic BP, mmHg                                 | 104 (99–110)            | 89             | 104 (99–108)  | 108            | 197            |
| Percentile <sup>e</sup>                           | 70.3 (22.2)             | 89             | 73.8 (17.9)   | 108            | 197            |
| Diastolic BP, mmHg                                | 54.6 (6.6)              | 89             | 53.0 (7.4)    | 108            | 197            |
| Percentile <sup>e</sup>                           | 40.4 (23.3)             | 89             | 35.9 (22.2)   | 108            | 197            |
| SAT, mm                                           | 5.4 (4.2–6.8)           | 85             | 6.5 (5.3–8.3) | 103            | 188            |
| ΔSAT, mm                                          | NA                      |                |               |                |                |
| VAT, mm                                           | 36.2 (5.6)              | 76             | 35.0 (6.8)    | 80             | 156            |
| ΔVAT, mm                                          | NA                      |                |               |                |                |
| cIMT, μm                                          | NA                      |                |               |                |                |
| Distensibility coefficient, 10 <sup>-3</sup> /kPa | NA                      |                |               |                |                |

| Characteristic                                    | Adolescence<br>(12–16 years) |                |                  |                | N <sup>c</sup> |
|---------------------------------------------------|------------------------------|----------------|------------------|----------------|----------------|
|                                                   | Male                         | N <sup>c</sup> | Female           | N <sup>c</sup> | Total          |
| Gestational age, wks                              | NA                           |                |                  |                |                |
| Birth weight, g                                   | NA                           |                |                  |                |                |
| Postnatal weight gain, Z-score <sup>d</sup>       | NA                           |                |                  |                |                |
| Age, y                                            | 14.7 (13.4–15.7)             | 109            | 14.9 (13.9–15.9) | 123            | 232            |
| BMI, kg/m <sup>2</sup>                            | 19.4 (3.3)                   | 109            | 20.2 (2.9)       | 123            | 232            |
| BMI, Z-score                                      | 0.1 (1.3)                    | 109            | 0.3 (1.0)        | 123            | 232            |
| Smoking, No. (%)                                  | 2 (1.8)                      | 102            | 0 (0.0)          | 121            | 223            |
| Family history of CVD, No. (%)                    | 32 (29.4)                    | 104            | 44 (35.8)        | 123            | 227            |
| Systolic BP, mmHg                                 | 112.8 (106–119.9)            | 108            | 111 (105–116)    | 123            | 231            |
| Percentile <sup>e</sup>                           | 44.5 (25.7)                  | 108            | 46.4 (22.9)      | 123            | 231            |
| Diastolic BP, mmHg                                | 56.7 (6.7)                   | 108            | 56.7 (6.2)       | 123            | 231            |
| Percentile <sup>e</sup>                           | 20.6 (16.3)                  | 108            | 17.0 (15.4)      | 123            | 231            |
| SAT, mm                                           | 9.3 (7.2–15.3)               | 80             | 13.7 (10.1–20.0) | 105            | 185            |
| ΔSAT, mm                                          | 4.1 (2.2–8.3)                | 64             | 6.8 (4.4–11.9)   | 89             | 153            |
| VAT, mm                                           | 45.3 (40.5–54.8)             | 77             | 40.8 (36.8–47.0) | 103            | 180            |
| ΔVAT, mm                                          | 11.4 (10.3)                  | 55             | 8.2 (10.8)       | 69             | 124            |
| cIMT, μm                                          | 430 (396–491)                | 109            | 435 (376–495)    | 123            | 232            |
| Distensibility coefficient, 10 <sup>-3</sup> /kPa | 40 (30–50)                   | 101            | 40 (40–50)       | 117            | 218            |

**eFigure 2. Early-life risk factors for carotid intima-media thickness (cIMT) and carotid distensibility in adolescence**

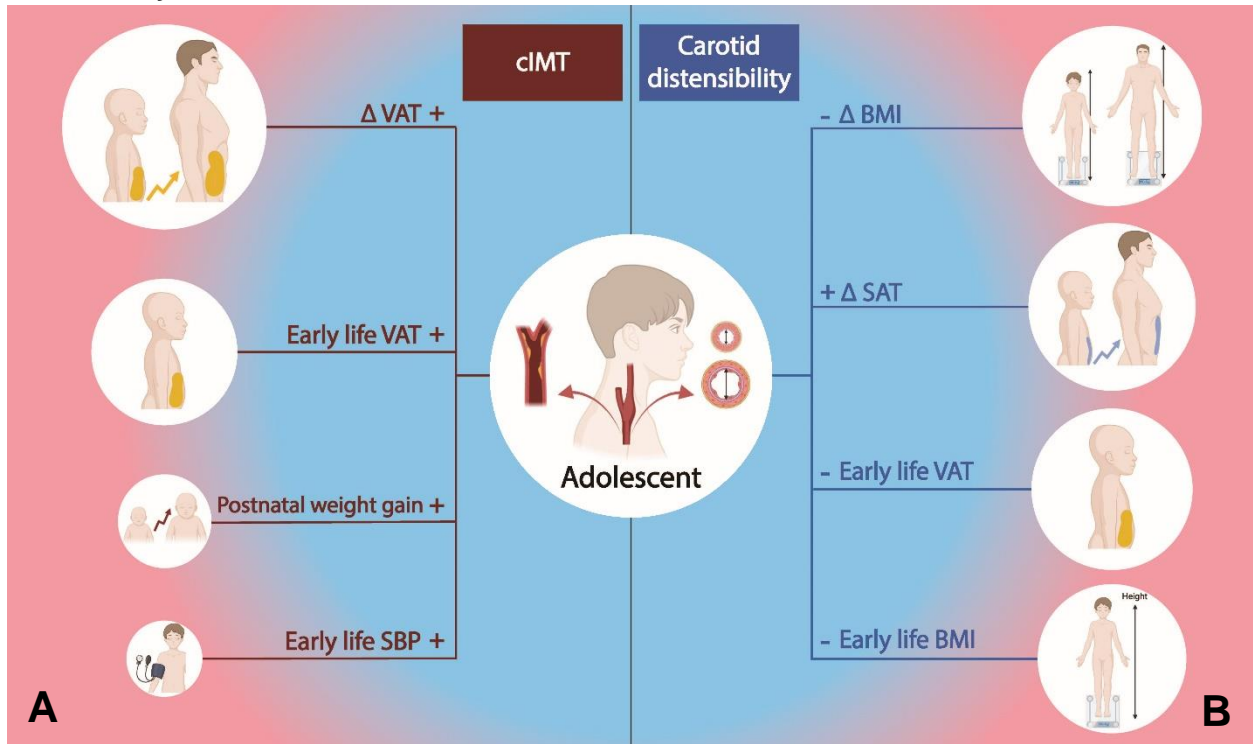

Summary of the study findings following assessment of cIMT (A) and carotid distensibility, assessed by the carotid distensibility coefficient (B). Risk factors with significant associations with the outcome measures are displayed in the white circles, scaled according to their effect size determined by the standardized beta coefficients. Plus signs (+) indicate a positive association and minus signs (-) indicate a negative association. VAT: abdominal visceral adipose tissue depth, SBP: systolic blood pressure, BMI: Body Mass Index, SAT: abdominal subcutaneous adipose tissue depth, “ $\Delta$ ” is the difference between the early life (5 years) and adolescent (12-16 years) value. Created with BioRender.com
